# Supplementary material for: Molecular insights into the electrowetting behavior of aqueous ionic liquids
Source: Royal Society of Chemistry journal article supplement (doi:10.1039/d1cp01821c), 2021-12-10
Supplement: d1cp01821c1.pdf [file d1cp01821c1.pdf]

## **Supporting Information**

### **Molecular Insights into the Electrowetting Behavior of Aqueous Ionic Liquid**

*Sanchari Bhattacharjee, Sandip Khan \**

Department of Chemical & Biochemical Engineering

Indian Institute of Technology Patna

Patna, India- 801103.

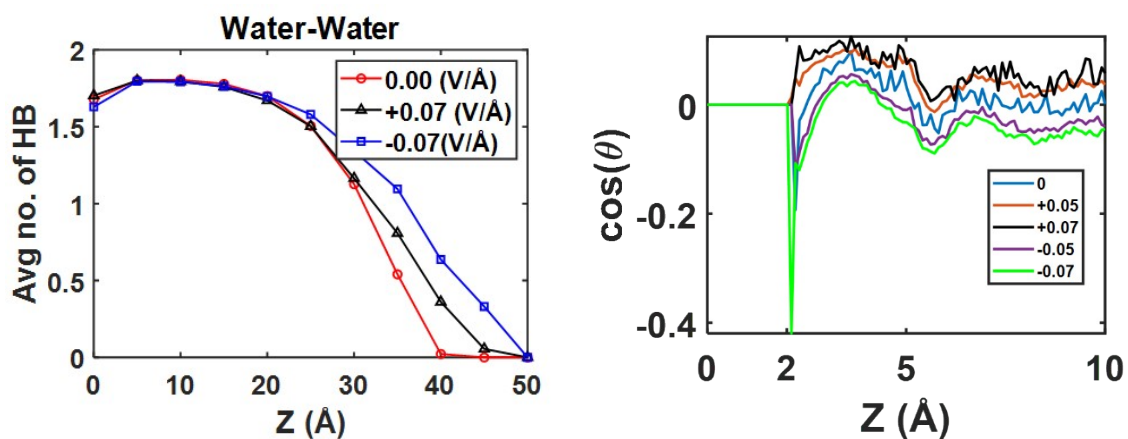

**Figure S1:** (a) Average hydrogen bond profile along the z-axis. (b) Dipole orientation of water at the solid-fluid interface on the application of the electric field.

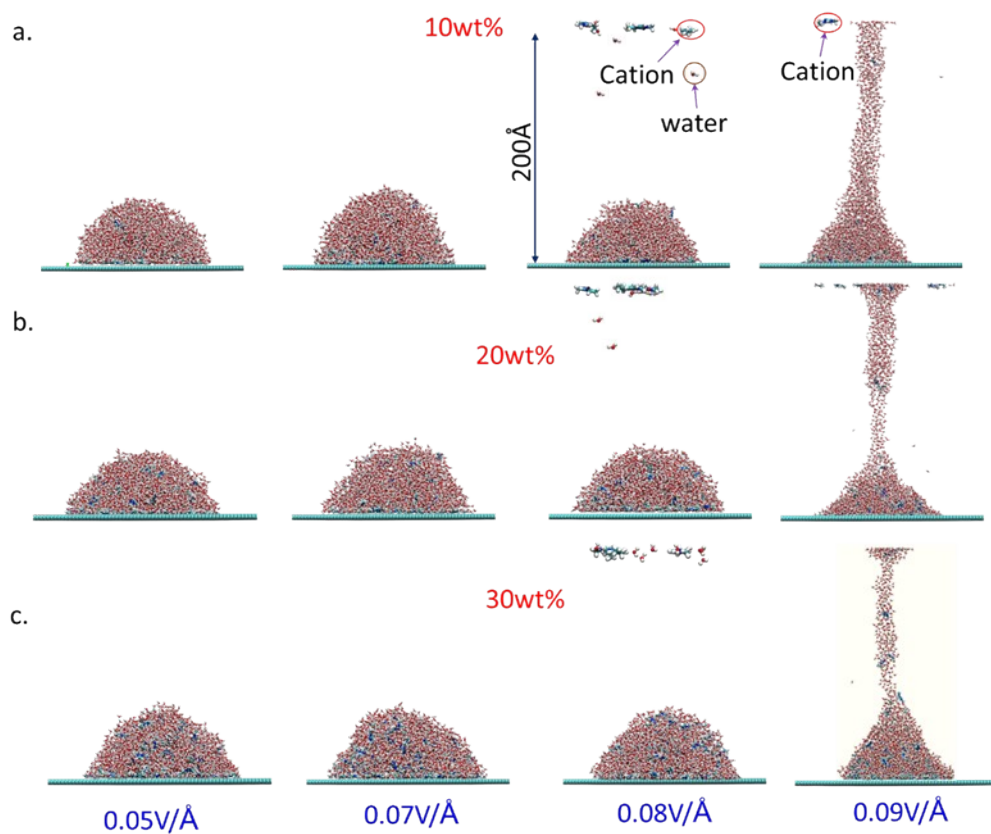

**Figure S2:** Snapshot of aqueous [EMIM][BF<sub>4</sub>] drop at the various electric fields.

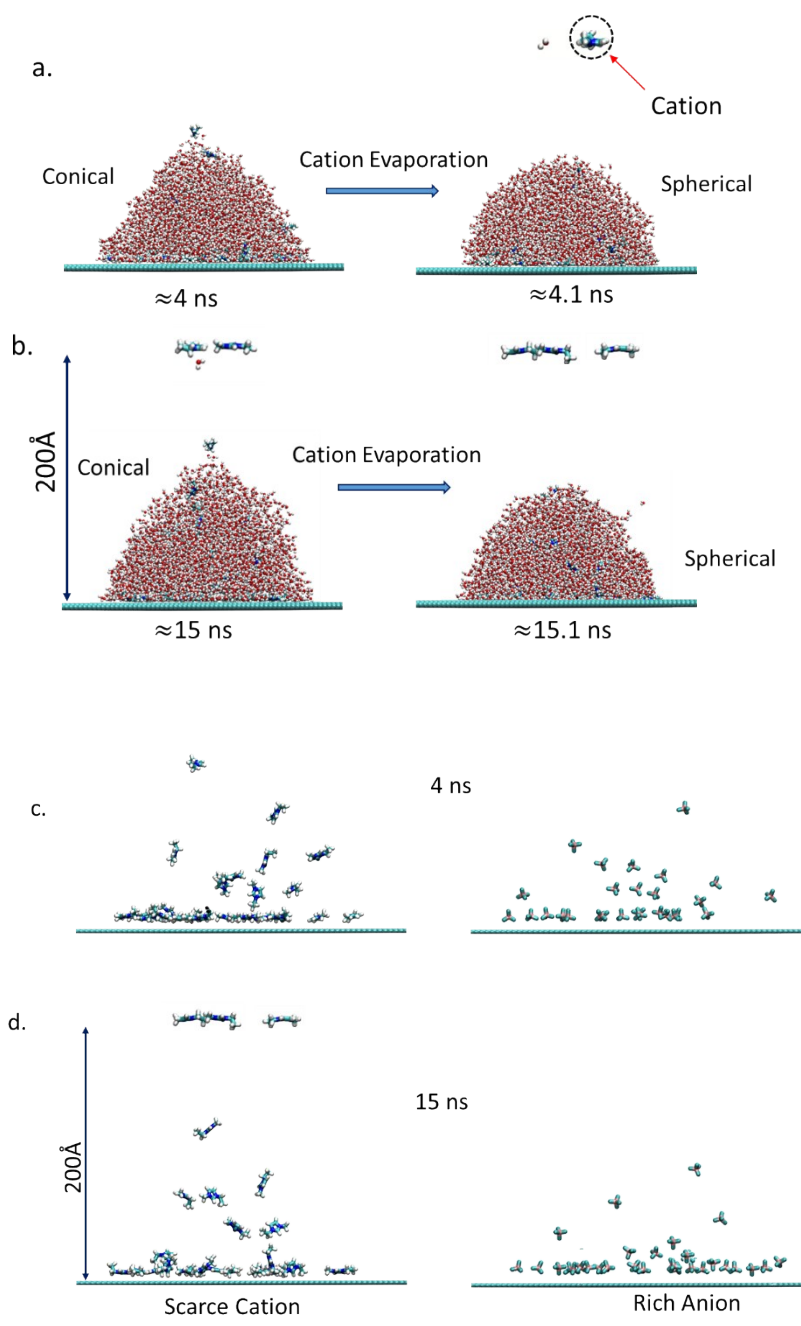

**Figure S3:** Droplet deformation of 10 wt.-% aqueous [EMIM][BF<sub>4</sub>] under application of an external electric field  $E = 0.08 \text{ V/\AA}$ .

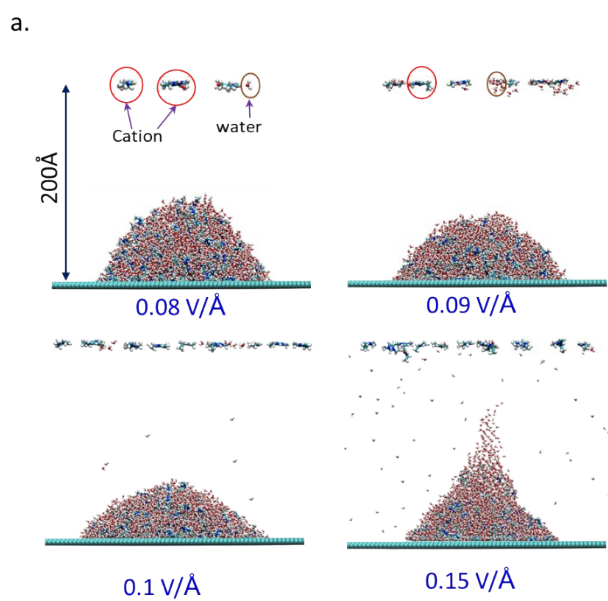

**Figure S4:** Snapshot of aqueous 50 wt-% [EMIM][BF<sub>4</sub>] drop at the various positive electric fields.

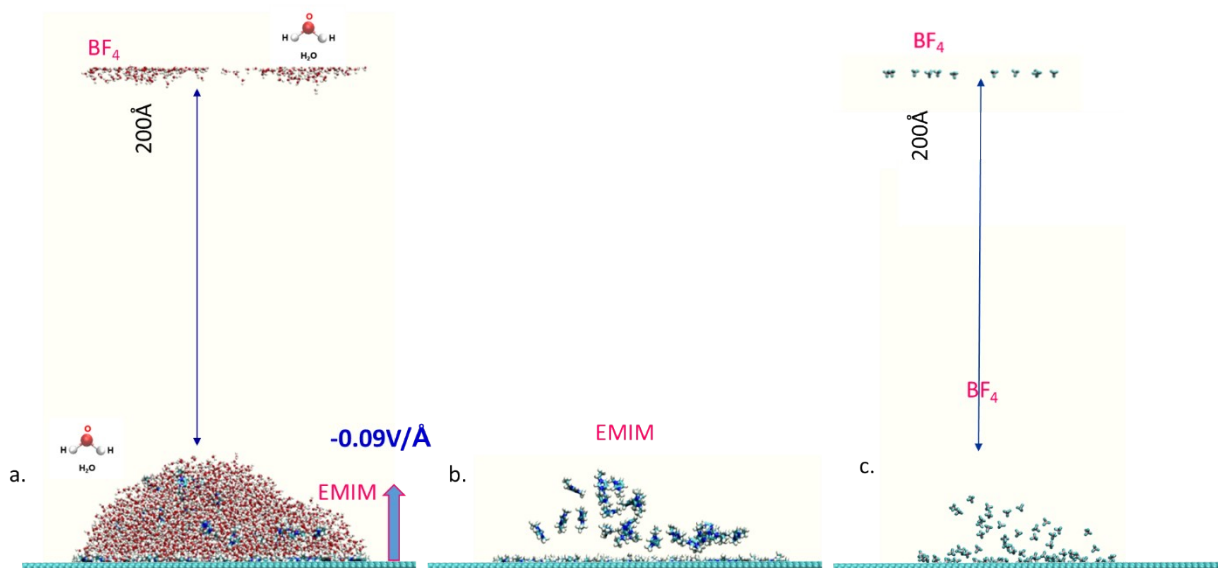

**Figure S5:** Configurational snapshot of 30 wt-% of [EMIM][BF<sub>4</sub>] at -0.09 V/Å a) Aqueous droplet b) Cations c) Anions

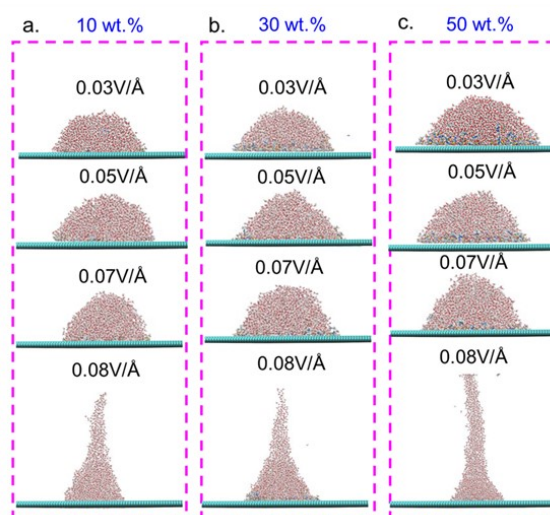

**Figure S6:** Snapshot of aqueous IL [EMIM][NTF<sub>2</sub>] droplet at the various electric fields (can be moved to SI)

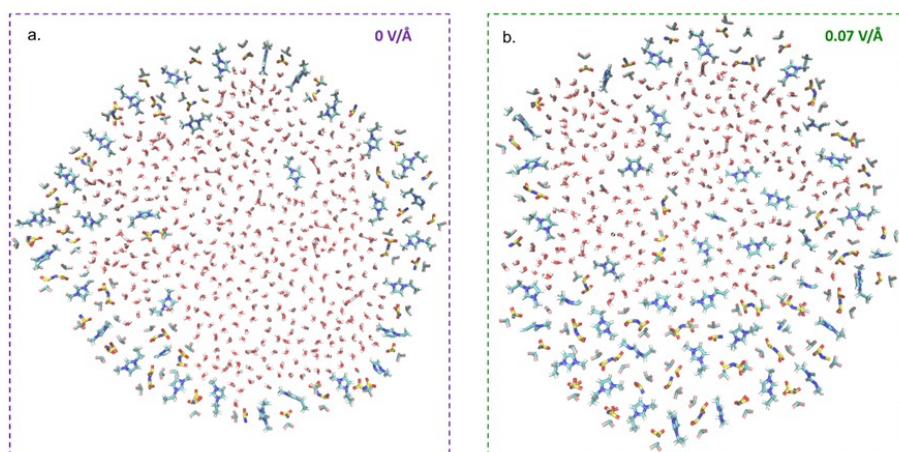

**Figure S7.** Snapshot of the first layer (near the surface) of aqueous 30 wt.% [EMIM][NTF<sub>2</sub>] ILs droplet with a)  $E=0$  V/Å and b)  $0.07$  V/Å, representing the distribution and orientation of molecules near graphene surface at the three-phase contact line.

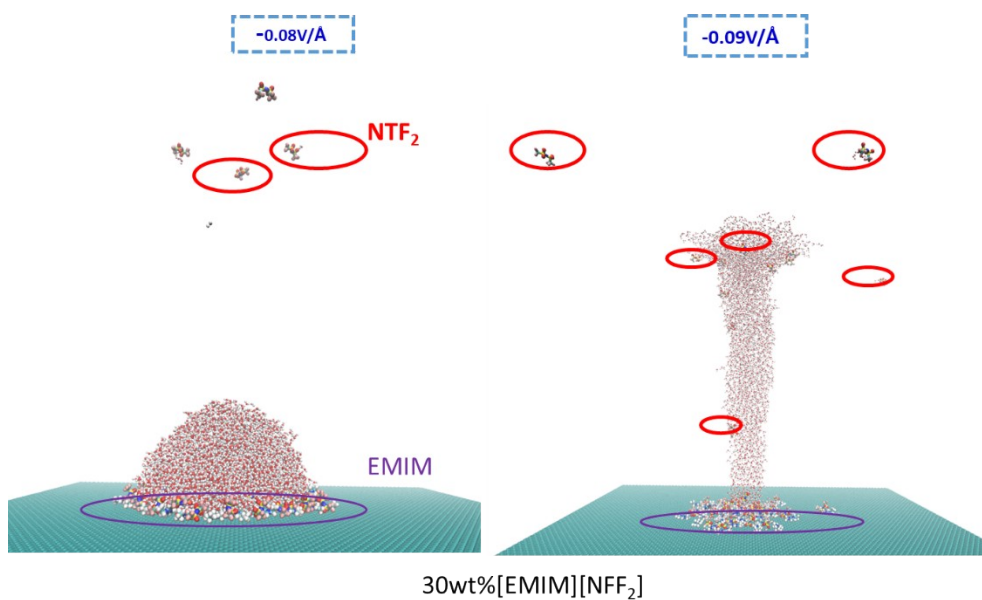

**Figure S8:** Snapshot of 30 wt.-% [EMIM][NTF<sub>2</sub>] at -0.08 V/Å and -0.09 V/Å

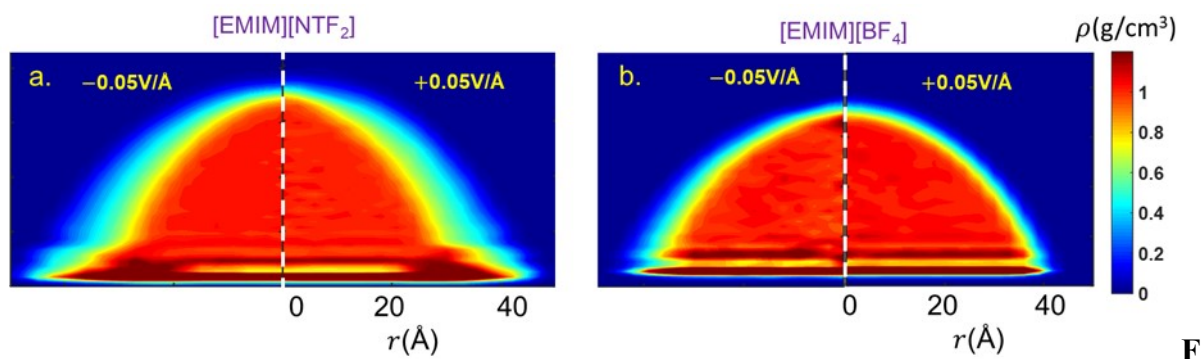

**Figure S9.** Density profiles of 30wt% a.) [EMIM][NTF<sub>2</sub>]. b) [EMIM][BF<sub>4</sub>] at ± 0.05 V/Å

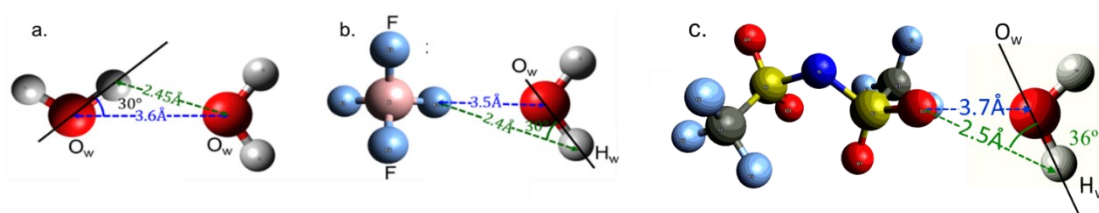

**Figure S10:** Hydrogen bond (HB) geometric criteria (a) for water-water (b) for  $\text{BF}_4$ -water (c) for  $\text{NTF}_2$ -water

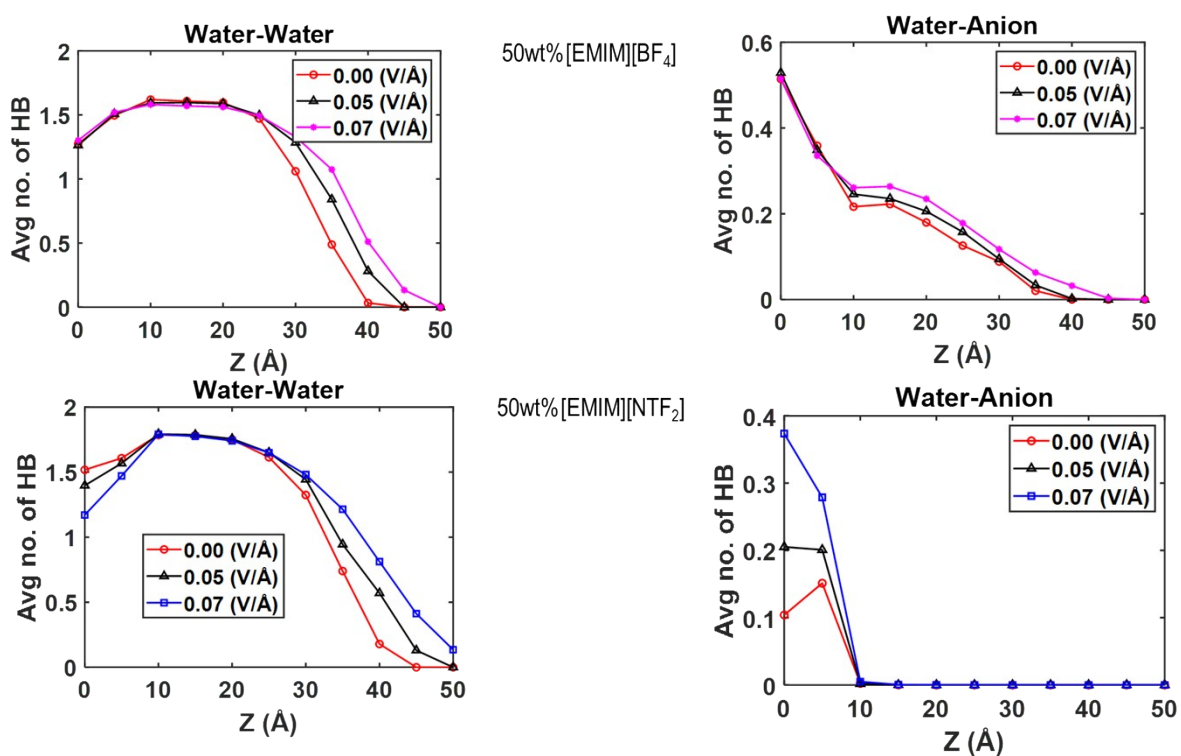

**Figure S11:** Hydrogen bond profile of 50 wt. % aqueous IL droplet at different electric fields

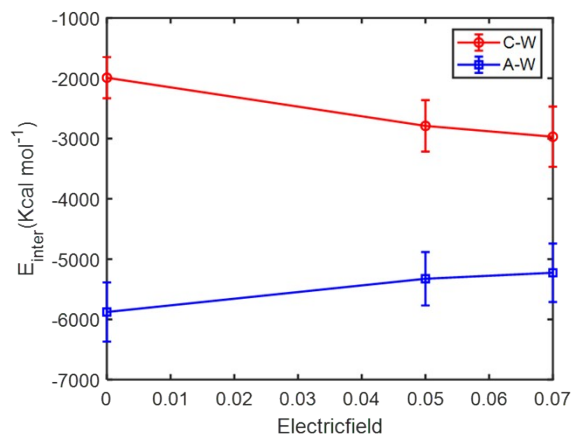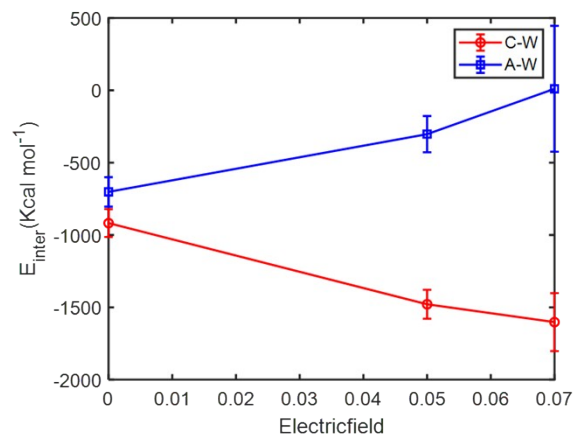

**Figure S12:** Interaction energy between a) [EMIM] –[Water] & [BF<sub>4</sub>]-[Water] b) [EMIM][Water] and [NTF<sub>2</sub>]-[Water]
